# Supplementary material for: A Truncated TIR-NBS Protein TN10 Pairs with Two Clustered TIR-NBS-LRR Immune Receptors and Contributes to Plant Immunity in Arabidopsis
Source: MDPI journal article supplement (doi:10.3390/ijms22084004), 2021-04-13
Supplement: s1 [file s1]

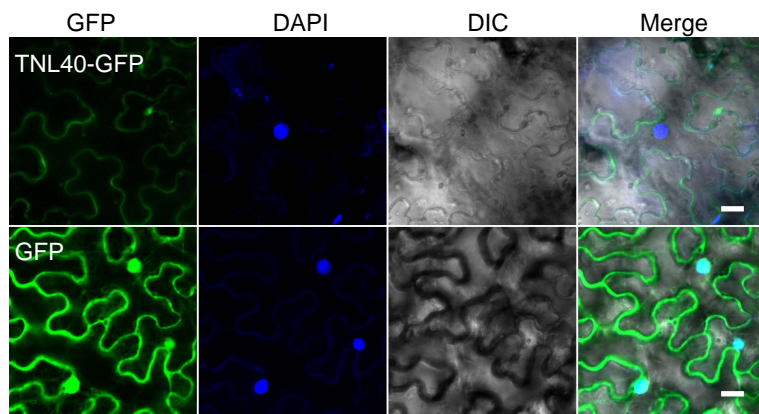

Supplementary Figure 6. Subcellular localization of TNL40 in *N. benthamiana* epidermal cells. The *TNL40-GFP* was transiently expressed in *N. benthamiana* leaves. GFP fluorescence was visualized 48 hours after transformation. The nucleus was displayed by diamidine phenylindole (DAPI) staining. The GFP alone protein was used as a control. Bar = 20  $\mu$ m.
