# Supplementary material for: A Truncated TIR-NBS Protein TN10 Pairs with Two Clustered TIR-NBS-LRR Immune Receptors and Contributes to Plant Immunity in Arabidopsis
Source: MDPI journal article supplement (doi:10.3390/ijms22084004), 2021-04-13
Supplement: s1 [file s1]

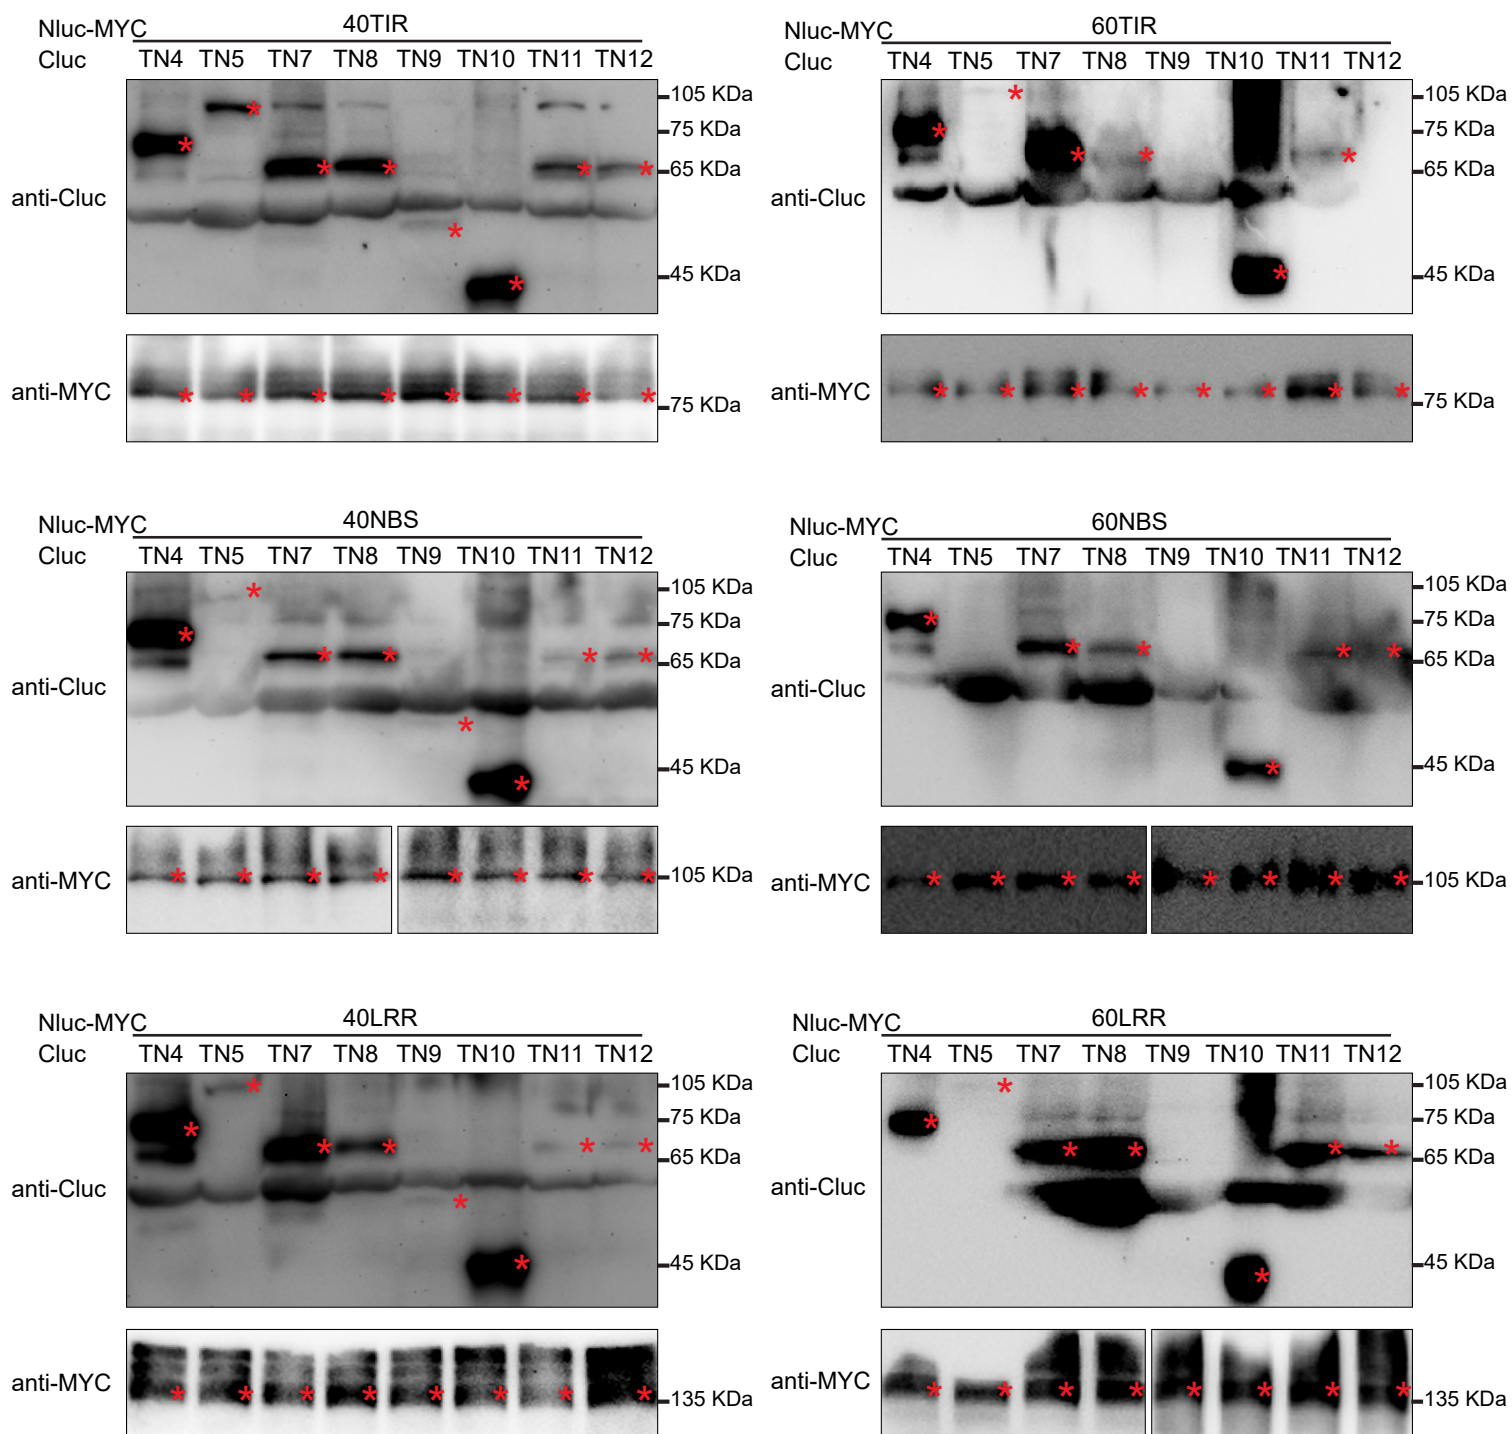

Supplementary Figure 2. Immunoblotting analysis of co-expression 40TIR, 40NBS, 40LRR, 60TIR, 60NBS, 60LRR with TN4-TN12 in *N. benthamiana*.

Different pairs of constructs were transiently expressed in *N. benthamiana* leaves as described in Supplementary Figure 1, the TN4-TN12 proteins were detected by anti-Cluc and 40TIR, 40NBS, 40LRR, 60TIR, 60NBS, 60LRR were detected by anti-MYC. Asterisks (\*) indicate the position of the corresponding proteins.
