# Supplementary material for: A Truncated TIR-NBS Protein TN10 Pairs with Two Clustered TIR-NBS-LRR Immune Receptors and Contributes to Plant Immunity in Arabidopsis
Source: Int J Mol Sci. 2021 Apr 13;22(8):4004. doi: 10.3390/ijms22084004 (PMC8069298; doi:10.3390/ijms22084004)
Supplement: Supplementary file 1 [file ijms-22-04004-s001.zip]

Archive with 10 entries (10 files):
- Final supps/Supplementary Figure 1.pdf
- Final supps/Supplementary Figure 10.pdf
- Final supps/Supplementary Figure 2.pdf
- Final supps/Supplementary Figure 3.pdf
- Final supps/Supplementary Figure 4.pdf
- Final supps/Supplementary Figure 5.pdf
- Final supps/Supplementary Figure 6.pdf
- Final supps/Supplementary Figure 7.pdf
- Final supps/Supplementary Figure 8.pdf
- Final supps/Supplementary Figure 9.pdf
