# Supplementary figures and images for: A Truncated TIR-NBS Protein TN10 Pairs with Two Clustered TIR-NBS-LRR Immune Receptors and Contributes to Plant Immunity in Arabidopsis
Source: MDPI journal article supplement (doi:10.3390/ijms22084004), 2021-04-13

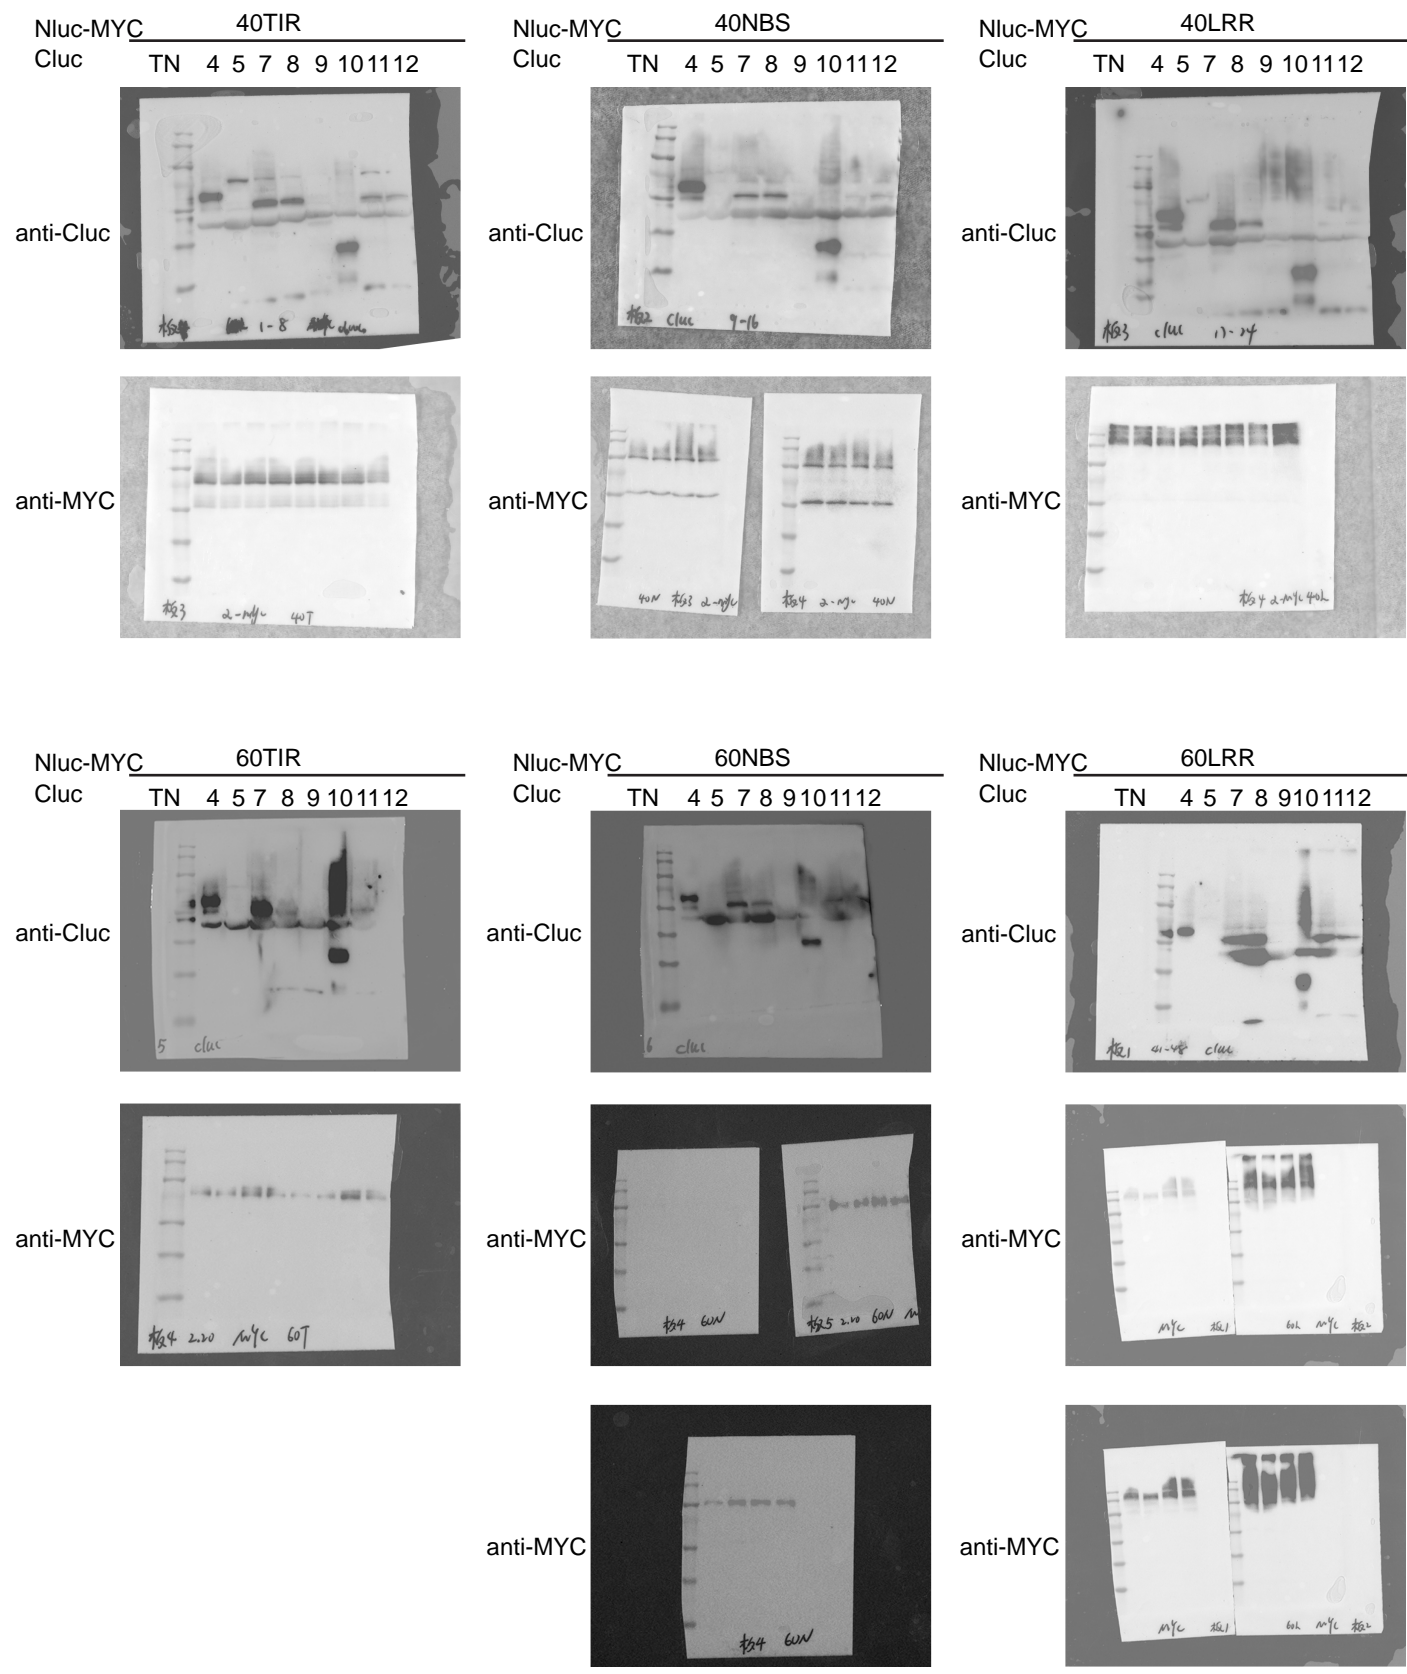

Supplementary Figure 9. The full size western blots gels of Supplementary Figure 2

Supplement: s1 [file s1]
